# Supplementary material for: Boosting eco-friendly hydrogen generation by urea-assisted water electrolysis using spinel M2GeO4(M = Fe, Co) as an active electrocatalyst
Source: Royal Society of Chemistry journal article supplement (doi:10.1039/d1en00529d), 2021-01-01
Supplement: d1en00529d1.pdf [file d1en00529d1.pdf]

**Boosting eco-friendly hydrogen generation by urea-assisted water electrolysis using  
spinel  $M_2GeO_4$  ( $M = Fe, Co$ ) as an active electrocatalyst**

Hyeonuk Choi<sup>1,2,3,‡</sup>, Subramani Surendran<sup>1,2,3,‡</sup>, Dohun Kim<sup>1,2,3</sup>, Yoongu Lim<sup>1,2,3,4</sup>, Jaehyoung Lim<sup>1,2,3</sup>, Jihyun Park<sup>1,2,3</sup>, Jung Kyu Kim<sup>5\*</sup>, Mi-Kyung Han<sup>1,2,3,4\*</sup>, and Uk Sim<sup>1,2,3,4\*</sup>

<sup>1</sup> Department of Materials Science & Engineering, Engineering Research Center, Chonnam National University, Gwangju 61186, South Korea

<sup>2</sup> Optoelectronics Convergence Research Center, Chonnam National University, Gwangju 61186, South Korea

<sup>3</sup> Future Energy Engineering Convergence, College of AI Convergence, Chonnam National University, Gwangju 61186, South Korea

<sup>4</sup> Research Institute, NEEL Sciences, INC., Gwangju 61186, South Korea

<sup>5</sup> School of Chemical Engineering, Sungkyunkwan University (SKKU), Suwon 16419, Republic of Korea

‡ These authors contributed equally to this work.

\*Corresponding author.

*E-mail address:*

*J. K Kim ([legkim@skku.e](mailto:legkim@skku.e))*

*M. Han ([mikihan73@gmail.com](mailto:mikihan73@gmail.com))*

*U. Sim ([usim@jnu.ac.kr](mailto:usim@jnu.ac.kr))*

**Keywords:** Urea oxidation reaction, Bimetallic oxide, Electrocatalyst, Hydrogen generation.

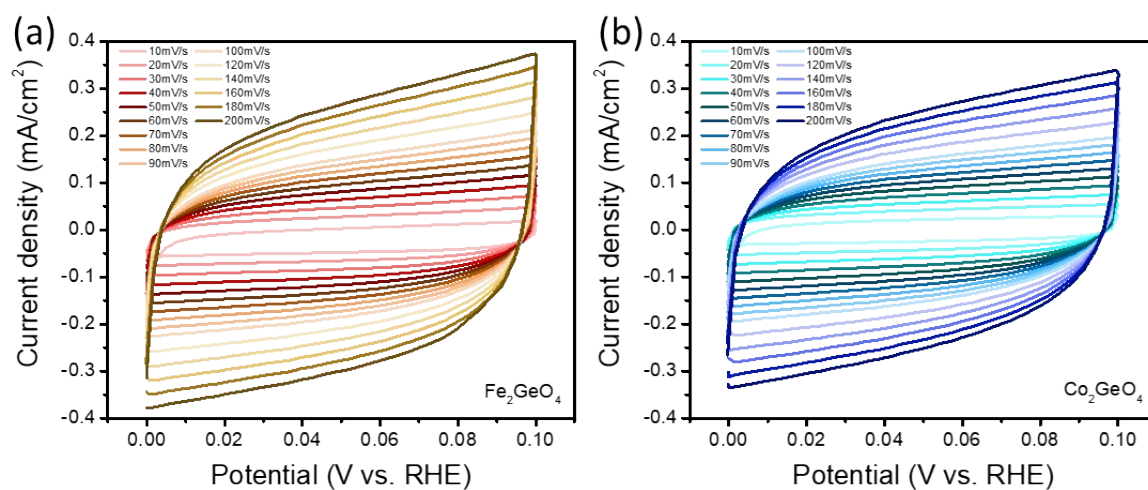

**Fig. S1.** CV analysis of (a) Fe<sub>2</sub>GeO<sub>4</sub> and (b) Co<sub>2</sub>GeO<sub>4</sub> at different scan rates for the electrochemical surface area measurement.

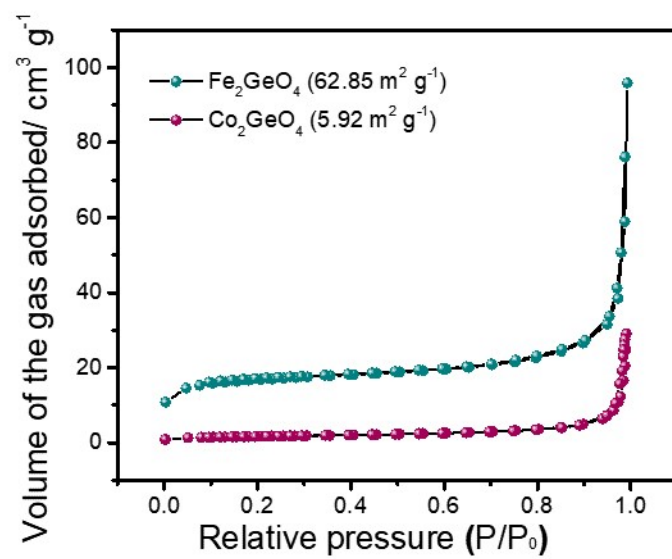

**Fig. S2.** BET results of prepread  $\text{Fe}_2\text{GeO}_4$  and  $\text{Co}_2\text{GeO}_4$  particles showing surface area of electrocatalysts.

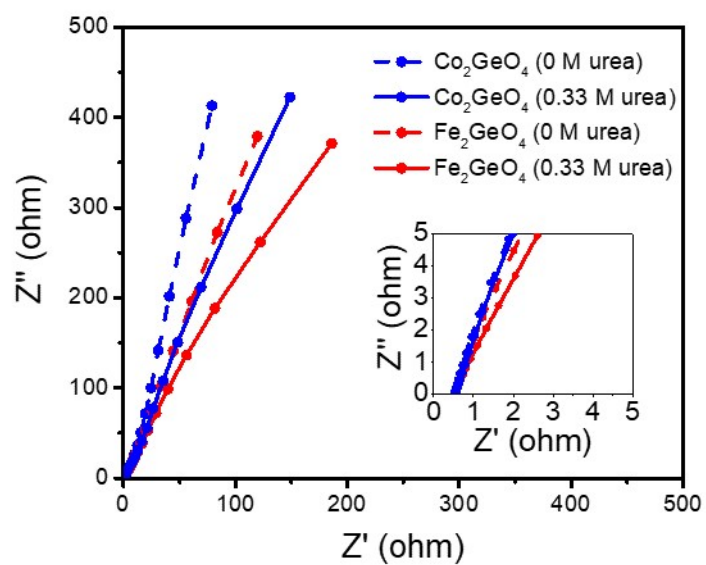

**Fig. S3.** Electrochemical analysis of the prepared  $\text{M}_2\text{GeO}_4$ . EIS analysis of  $\text{Fe}_2\text{GeO}_4$  and  $\text{Co}_2\text{GeO}_4$  at open-circuit voltage under 1 M KOH with/without 0.33 urea condition.

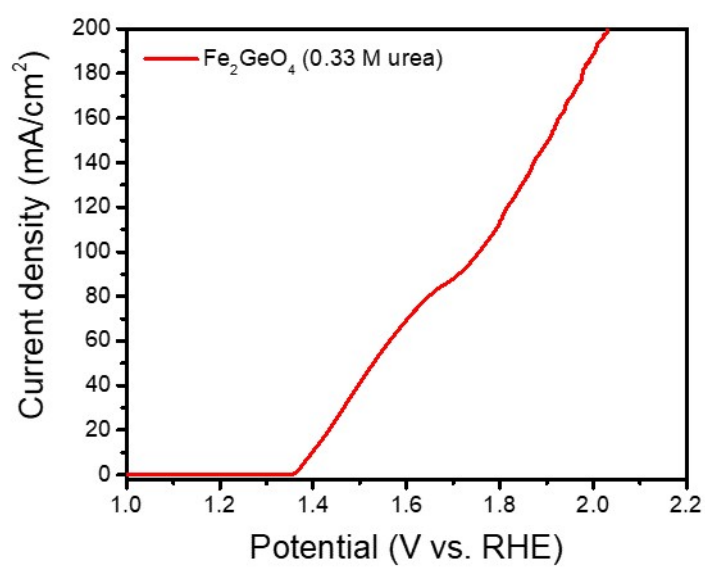

**Fig. S4.** Linear sweep voltammetry analysis of Fe<sub>2</sub>GeO<sub>4</sub> electrocatalyst in 1 M alkaline with 0.33 M urea condition under wide potential window.

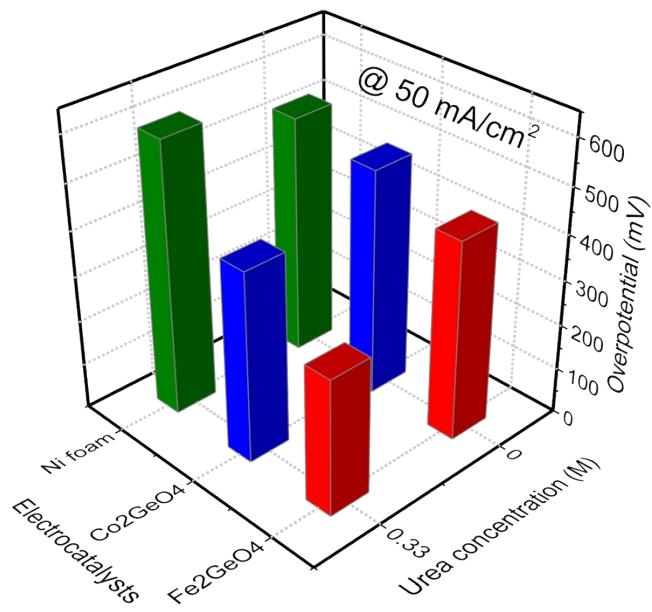

**Fig. S5.** The overpotential at 50 mA/cm<sup>2</sup> of prepared electrode under 1.00 M KOH with/without 0.33 M urea.

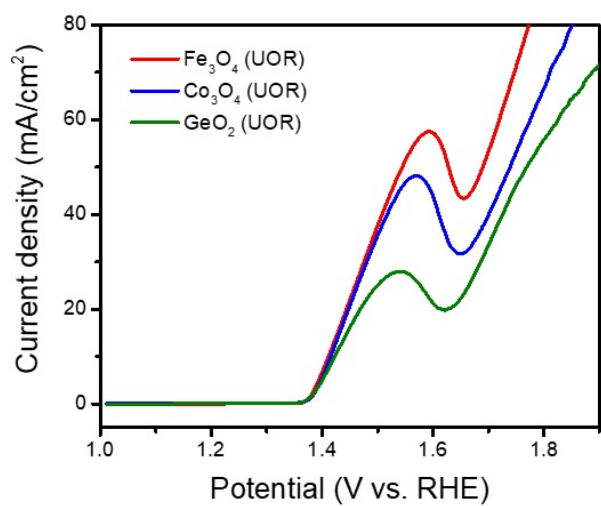

**Fig. S6.** Linear sweep voltammetry analysis of Fe<sub>3</sub>O<sub>4</sub>, Co<sub>3</sub>O<sub>4</sub>, and GeO<sub>2</sub> in 0.1 M alkaline with/without 0.33 M urea condition

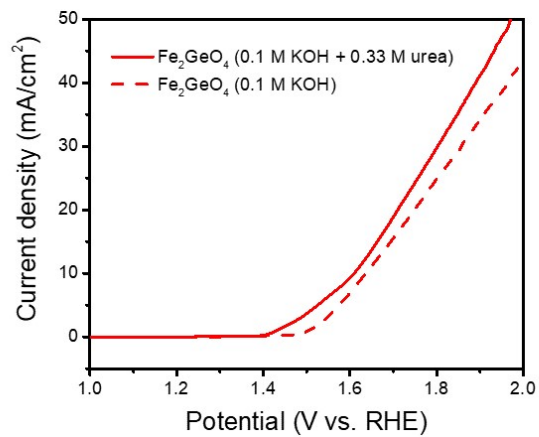

**Fig. S7.** Linear sweep voltammetry analysis of Fe<sub>2</sub>GeO<sub>4</sub> in 0.1 M alkaline with/without 0.33 M urea condition.



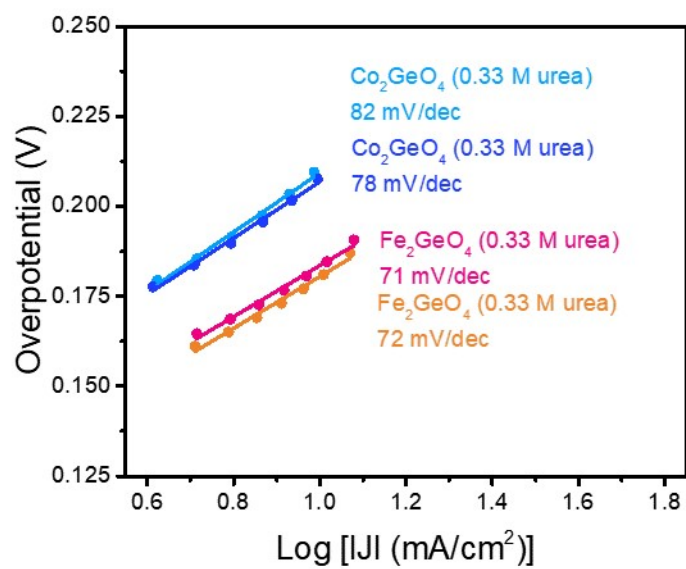

**Fig. S8.** Tafel slopes of the prepared electrode in alkaline solution with urea.

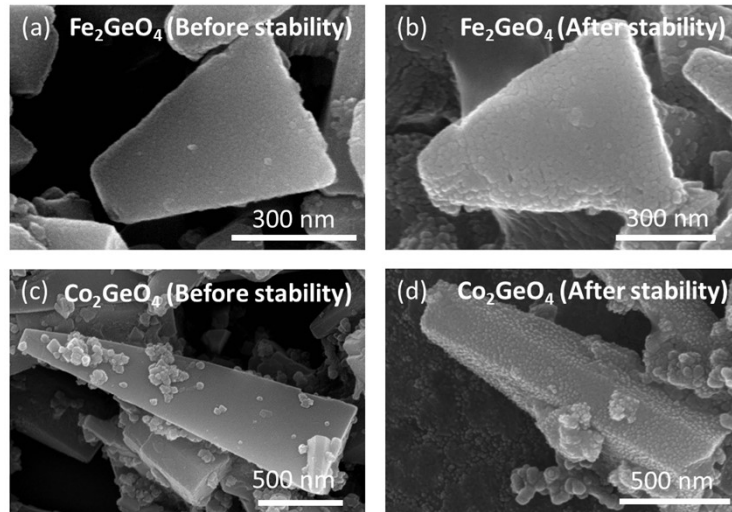

**Fig. S9.** SEM images of  $\text{Fe}_2\text{GeO}_4$  on Ni foam before (a) and after (b) stability test, respectively, and  $\text{Co}_2\text{GeO}_4$  on Ni foam before (c) and after (d) stability test, respectively.

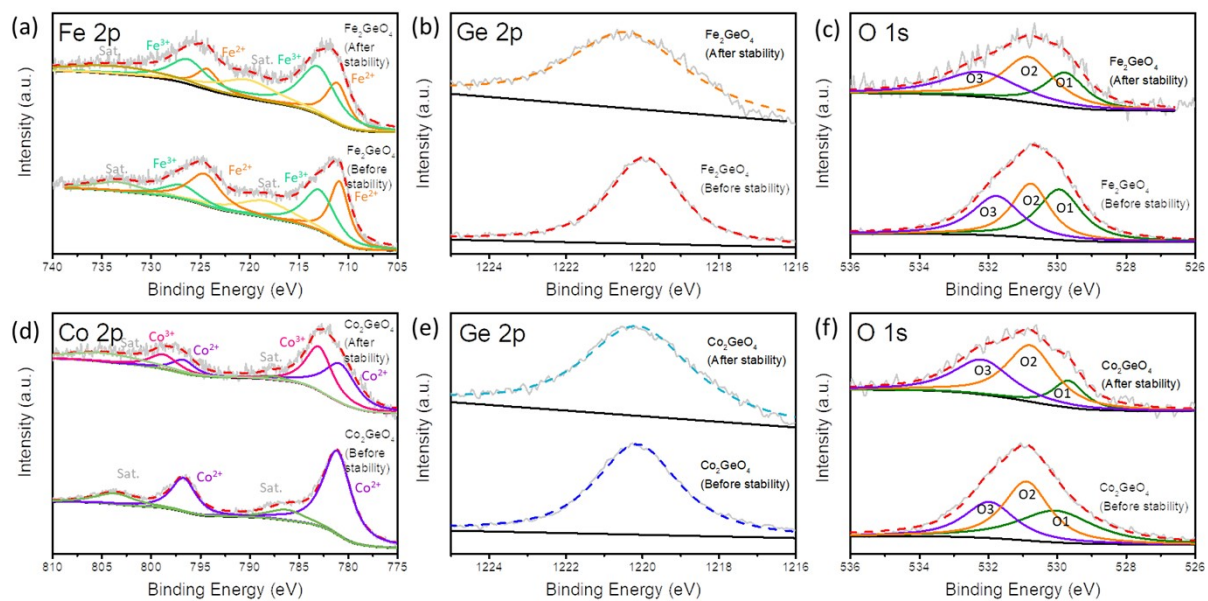

**Fig. S10.** XPS analysis of  $\text{Fe}_2\text{GeO}_4$  and  $\text{Co}_2\text{GeO}_4$ : high-resolution spectra of (a) Fe 2p (b) Ge 2p, and (c) O 1s of  $\text{Fe}_2\text{GeO}_4$  before and after stability test, (d) Co 2p (e) Ge 2p, and (f) O 1s of  $\text{Co}_2\text{GeO}_4$  before and after stability test.

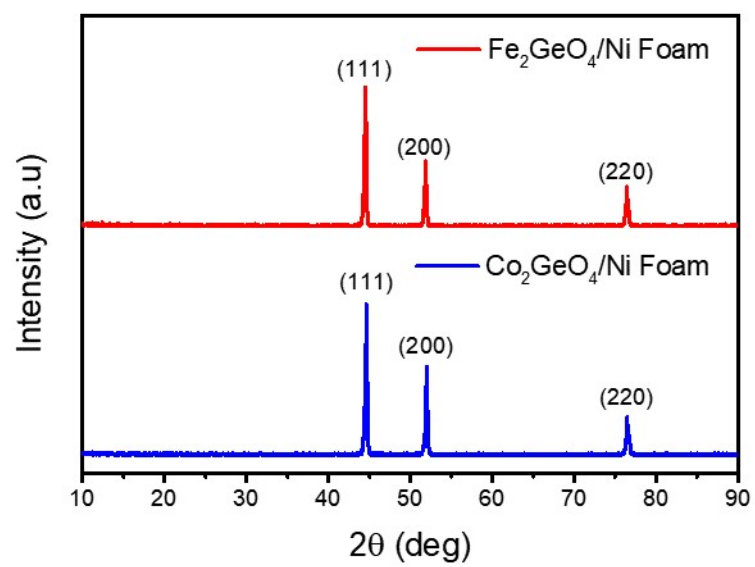

**Fig. S11.** XRD analysis of Fe<sub>2</sub>GeO<sub>4</sub> (red) and Co<sub>2</sub>GeO<sub>4</sub> (blue) on Ni foam after stability test.

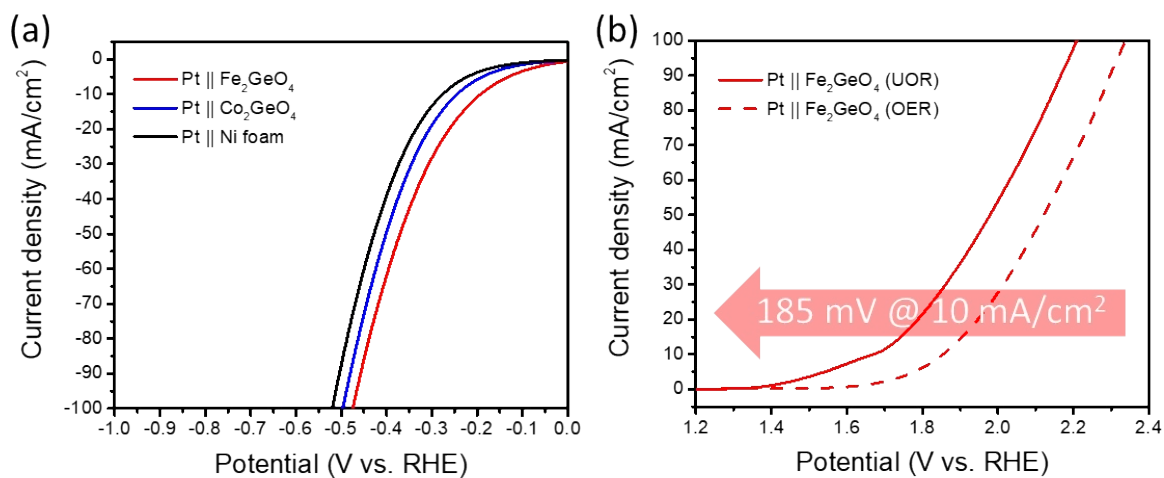

**Fig. S12.** (a) Hydrogen evolution reaction of Pt coil in prepared electrocatalysts under 1 M KOH, (b) urea oxidation reaction of Pt||Fe<sub>2</sub>GeO<sub>4</sub> under 1.00 M KOH with/without 0.33 M urea.

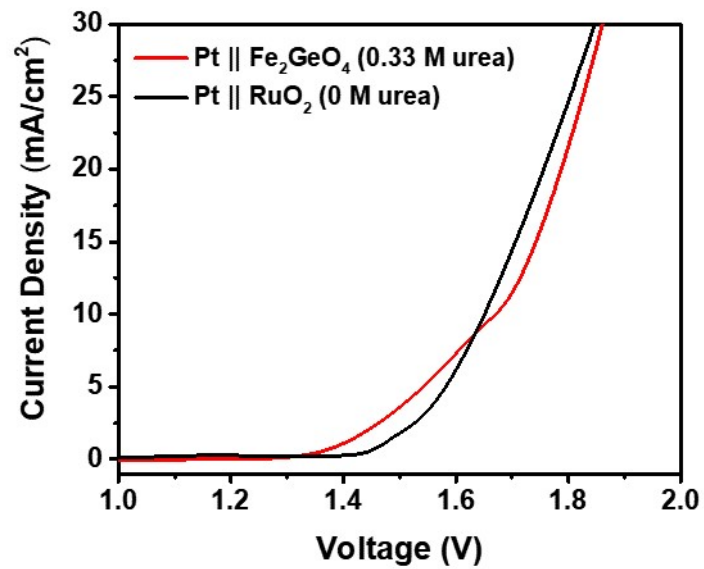

**Fig. S13.** Linear sweep voltammetry analysis of Pt || Fe<sub>2</sub>GeO<sub>4</sub> system in 1 M KOH with 0.33 M urea condition and Pt || RuO<sub>2</sub> system in 1 M KOH.

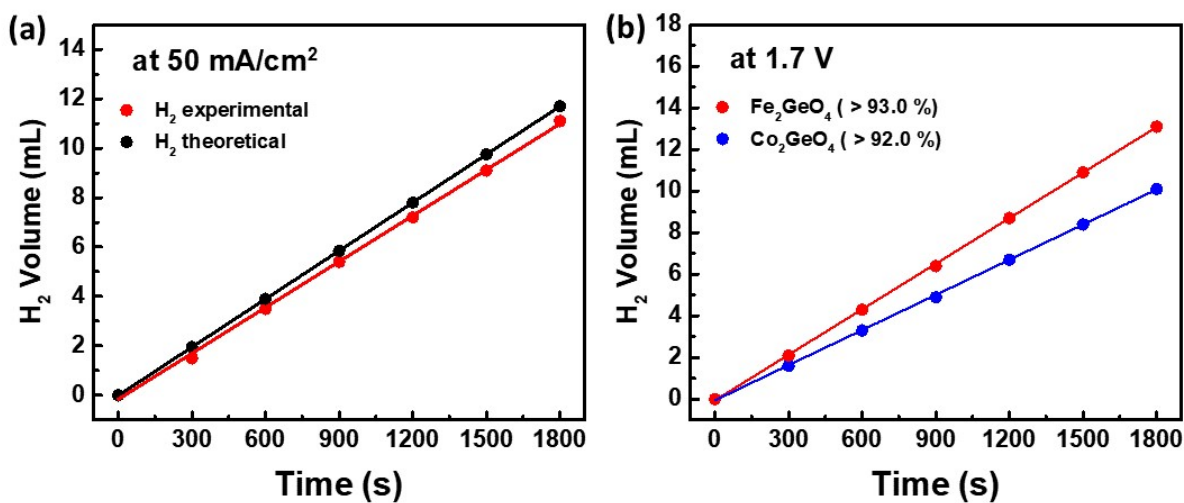

**Fig. S14.** Faradic efficiency of Fe<sub>2</sub>GeO<sub>4</sub> electrocatalyst at constant current (a) and potential (b).

To verify the effectiveness of urea-assisted water electrolysis, Faradaic efficiency (FE) was calculated by the below equation: <sup>1</sup>

$$FE = (\text{experimental } \mu\text{mol of H}_2 \text{ gas} / \text{theoretical } \mu\text{mol of H}_2 \text{ gas}) * 100$$

For the experimental amount of H<sub>2</sub> gas, the number of mol H<sub>2</sub> gas produced in water displacement is calculated from the ideal gas equation :

$$PV = nRT$$

where P [atm] is pressure considering vapor pressure of water Dalton's law of partial pressure equation (0.975 [atm]), V [L] is the volume of experimentally measured H<sub>2</sub> gas, T [K] is the experiment temperature, and R [L \* atm / mol \* K] is the ideal gas constant (0.0821 [L \* atm / mol \* K]).

For the theoretical amount of H<sub>2</sub> gas, the number of mol H<sub>2</sub> gas was theoretically calculated using Faraday's law equation

$$n = (I * t) / (z * F)$$

n is the number of mol H<sub>2</sub> gas, I [A] is the measured current, t [s] is the experiment time, z is the number of electron transfer (for HER, z = 2), and F [C / mol] is the Faraday constant (96,485 [C / mol]).



**Table 1.** Atomic ratios of Fe<sub>2</sub>GeO<sub>4</sub> and Co<sub>2</sub>GeO<sub>4</sub> determined by EDS

| <b>Catalysts</b>                 | <b>Fe</b> | <b>Co</b> | <b>Ge</b> | <b>O</b> |
|----------------------------------|-----------|-----------|-----------|----------|
| Fe <sub>2</sub> GeO <sub>4</sub> | 23.95     | -         | 6.52      | 69.51    |
| Co <sub>2</sub> GeO <sub>4</sub> | -         | 25.38     | 13.57     | 61.04    |

**Table S2.** Electrochemical impedance parameters from the Fe<sub>2</sub>GeO<sub>4</sub> for the urea oxidation reaction.

| No.  | Potential (V vs. RHE) | R <sub>Ω</sub> [Ohm] | R <sub>f</sub> [Ohm] | R <sub>ct</sub> [Ohm] | C <sub>f</sub> [F] | C <sub>dl</sub> [F] | W [Ohm s <sup>-1/2</sup> ] |
|------|-----------------------|----------------------|----------------------|-----------------------|--------------------|---------------------|----------------------------|
| 1    | O (V vs. OCP)         | 0.5198               | 8.565                | 1199                  | 2.267e-3           | 2.745e-3            | 16.31                      |
| dev. |                       | 0.3269               | 6.295                | 103.8                 | 1.091e-3           | 0.1667e-3           | 8.15                       |
| 2.   | 1.30                  | 0.5079               | 17                   | 606.5                 | 1.96e-3            | 3.318e-3            | 9.125                      |
| dev. |                       | 0.3295               | 5.941                | 0.9473e-3             | 0.2231e-3          | 0.2231e3            | 16.73                      |
| 3.   | 1.35                  | 0.5052               | 14.46                | 14.46                 | 2.217e-3           | 4.081e-3            | 8.719                      |
| dev. |                       | 0.3351               | 4.034                | 4.034                 | 1.508e-3           | 0.4147e-3           | 18.38                      |
| 4.   | 1.40                  | 0.5352               | 8.52                 | 1.904                 | 4.237e-3           | 2.933e-3            | 2.279                      |
| dev. |                       | 0.2669               | 12.44                | 12.65                 | 0.01329            | 4.132e-3            | 1.344                      |
| 5.   | 1.45                  | 0.5394               | 1.344                | 2.557                 | 3.075e-3           | 7.908e-3            | 1.203                      |
| dev. |                       | 0.2758               | 19.38                | 19.17                 | 0.01102            | 0.114               | 1.071                      |
| 6.   | 1.50                  | 0.55                 | 2.259                | 2.765                 | 0202026            | 3.378e-3            | 1.414                      |
| dev. |                       | 0.2437               | 20.16                | 20.21                 | 0.3484             | 6.03e-3             | 1.528                      |
| 7.   | 1.55                  | 0.5582               | 0.08386              | 2.267                 | 3.438e-3           | 3.082e-3            | 5.82e-24                   |
| dev. |                       | 1                    | 1                    | 1                     | 1                  | 1                   | 0                          |
| 8.   | 1.60                  | 0.5756               | 0.07568              | 0.4175                | 2.795e-3           | 3.488e-3            | 0.4175                     |
| dev. |                       | 0.3502               | 9.592                | 9.637                 | 0.106              | 0.1651              | 9.637                      |

**Table S3.** Electrochemical impedance parameters from the  $\text{Co}_2\text{GeO}_4$  for the urea oxidation reaction.

| No.  | Potential (V vs. RHE) | $R_\Omega$ [Ohm] | $R_f$ [Ohm] | $R_{ct}$ [Ohm] | $C_f$ [F] | $C_{dl}$ [F] | $W$ [Ohm s <sup>-1/2</sup> ] |
|------|-----------------------|------------------|-------------|----------------|-----------|--------------|------------------------------|
| 1    | O (V vs. OCP)         | 0.5044           | 19.27       | 2691           | 0.8242e-3 | 1.138e-3     | 19.11                        |
| dev. |                       | 0.3058           | 4.961       | 83.58          | 0.1741e-3 | 30.44e-6     | 1.372                        |
| 2.   | 1.30                  | 2.051            | 275.9       | 6.982          | 0.01314   | 0.01021      | 12.44                        |
| dev. |                       | 0.3073           | 78.63       | 4.996          | 1.001e-3  | 0.01347      | 11.9                         |
| 3.   | 1.35                  | 2.071            | 5.826       | 47.43          | 8.98e-3   | 0.01023      | 8.39                         |
| dev. |                       | 0.2327           | 8.36        | 26.92          | 0.01007   | 5.64e-3      | 8.719                        |
| 4.   | 1.40                  | 2.126            | 12.48       | 2.268          | 8.253e-3. | 7.399e-3     | 2.576                        |
| dev. |                       | 0.2327           | 15.25       | 13.99          | 0.01932   | 4.187e-3     | 1.899                        |
| 5.   | 1.45                  | 2.141            | 2.443       | 5.981          | 0.01461   | 7.657e-3     | 2.727                        |
| dev. |                       | 0.2362           | 17.96       | 18.65          | 0.1222    | 0.01951      | 1.896                        |
| 6.   | 1.50                  | 2.131            | 5.974       | 2.676          | 0.01461   | 7.657e-3     | 2.727                        |
| dev. |                       | 0.2315           | 29.06       | 27.62          | 0.1222    | 0.01951      | 1.896                        |
| 7.   | 1.55                  | 2.145            | 6.88        | 0.3604         | 5.647e-3  | 7.062e-3     | 2.285e-39                    |
| dev. |                       | 1                | 1           | 1              | 1         | 1            | 0                            |
| 8.   | 1.60                  | 2.15             | 1.459       | 0.2255         | 5.654e-3  | 4.007e-3     | 1.891e-15                    |
| dev. |                       | 1                | 1           | 1              | 1         | 1            | 0                            |

**Table S4.** Comparison of urea oxidation performances of  $M_2GeO_4$  and other electrocatalysts under 1.00 M KOH with specific urea condition

| Catalysts                  | Support            | Potential (V vs. RHE) @<br>Current density (mA/cm <sup>2</sup> ) | Urea (M) | Stability | Ref.      |
|----------------------------|--------------------|------------------------------------------------------------------|----------|-----------|-----------|
| $Fe_2GeO_4$                | Ni foam            | 1.39 @ 10                                                        | 0.33     | 24 h      | This work |
| $Co_2GeO_4$                | Ni foam            | 1.42 @ 10                                                        | 0.33     | 24 h      | This work |
| CoP/C                      | Ni foam            | 1.354 @ 10                                                       | 0.1      | 12 h      | 2         |
| $CuCo_2O_4$ nanosheets     | Ni foam            | 1.36 @ 10                                                        | 0.33     | 15 h      | 3         |
| $CoS_2$ nanoneedle array   | Ti mesh            | 1.4 @ 10                                                         | 0.3      | 15000 s   | 4         |
| $RuO_2$                    | Ti mesh            | 1.5 @ 10                                                         | 0.3      | -         | 4         |
| Co(OH)F                    | Ni foam            | 1.25 @ 10                                                        | 0.7      | 10 h      | 5         |
| $Co_3Mo_1S$                | Carbon cloth       | 1.31 @ 10                                                        | 0.5      | -         | 6         |
| $CoMoO_4/Co_9S_8$          | Ni foam            | 1.402 @ 10                                                       | -        | 13 h      | 7         |
| $Co_3O_4$ nanoarray        | Ni foam            | 1.40 @ 20                                                        | 0.5      | -         | 8         |
| Ru- $Co_2P/N-C$            | Ni foam            | 1.351 @ 50                                                       | 0.5      | 15 h      | 9         |
| CoRu-MOF                   | Ni foam            | 1.43 @ 50                                                        | 0.5      | -         | 9         |
| $RuO_2$                    | Ni foam            | 1.43 @ 50                                                        | 0.5      | -         | 9         |
| Pt/C                       | Ni foam            | 1.441 @ 50                                                       | 0.5      | -         | 9         |
| -                          | Ni foam            | 1.475 @ 50                                                       | 0.5      | -         | 9         |
| FeOOH                      | Ni foam            | 1.40 @ 100                                                       | 0.5      | 600 s     | 10        |
| $Ni_{60}Cr_{40}/C$         | Glassy carbon disk | 1.55 @ 90                                                        | 0.33     | 2000 s    | 11        |
| $NiCo_2O_4$                | Carbon paper       | 1.73 @ 5                                                         | 0.33     | -         | 12        |
| $Co_3O_4-SrCo_3$           | Carbon nanofiber   | 1.73 @ 30                                                        | 0.33     | -         | 13        |
| $Cu(OH)_2$ nanowire arrays | Cu foam            | 1.49 @ 10                                                        | 0.5      | 12 h      | 14        |

**Table S5.** Energy efficiencies of Pt || M<sub>2</sub>GeO<sub>4</sub> cell at 1.7 V.

| <b>Electrocatalyst</b> | Fe <sub>2</sub> GeO <sub>4</sub> | Co <sub>2</sub> GeO <sub>4</sub> |
|------------------------|----------------------------------|----------------------------------|
| <b>EE (%)</b>          | 20.2                             | 20.0                             |

The full cell energy efficiency (EE) with the M<sub>2</sub>GeO<sub>4</sub> catalyst is calculated according to the below equation<sup>15, 16</sup>:

$$\text{Energy Efficiency} = (E_{\text{UOR}} / E_{\text{Full-cell}}) * \text{FE}_{\text{H}_2}$$

where the E<sub>UOR</sub> is the thermodynamic onset voltage (for HER||UOR, E<sub>UOR</sub> = 0.37 [V]) and E<sub>Full-cell</sub> is the applied potential for full cell.

The measured full-cell energy efficiencies of Fe<sub>2</sub>GeO<sub>4</sub> and Co<sub>2</sub>GeO<sub>4</sub> are 20.2 and 20.0 % at 1.7 V,

## References:

1. S. Sultan, M. Ha, D. Y. Kim, J. N. Tiwari, C. W. Myung, A. Meena, T. J. Shin, K. H. Chae and K. S. Kim, Superb water splitting activity of the electrocatalyst Fe<sub>3</sub>Co(PO<sub>4</sub>)<sub>4</sub> designed with computation aid, *Nature communications*, 2019, **10**, 1-9.
2. J. Zheng, K. Wu, C. Lyu, X. Pan, X. Zhang, Y. Zhu, A. Wang, W.-M. Lau and N. Wang, Electrocatalyst of two-dimensional CoP nanosheets embedded by carbon nanoparticles for hydrogen generation and urea oxidation in alkaline solution, *Applied Surface Science*, 2020, **506**, 144977.
3. C. Zequine, F. Wang, X. Li, D. Guragain, S. R. Mishra, K. Siam, P. K. Kahol and R. K. Gupta, Nanosheets of CuCo<sub>2</sub>O<sub>4</sub> as a high-performance electrocatalyst in urea oxidation, *Applied Sciences*, 2019, **9**, 793.
4. S. Wei, X. Wang, J. Wang, X. Sun, L. Cui, W. Yang, Y. Zheng and J. Liu, CoS<sub>2</sub> nanoneedle array on Ti mesh: A stable and efficient bifunctional electrocatalyst for urea-assisted electrolytic hydrogen production, *Electrochimica Acta*, 2017, **246**, 776-782.
5. M. Song, Z. Zhang, Q. Li, W. Jin, Z. Wu, G. Fu and X. Liu, Ni-foam supported Co(OH)<sub>2</sub> and Co-P nanoarrays for energy-efficient hydrogen production via urea electrolysis, *Journal of Materials Chemistry A*, 2019, **7**, 3697-3703.
6. P. Li, Z. Zhuang, C. Du, D. Xiang, F. Zheng, Z. Zhang, Z. Fang, J. Guo, S. Zhu and W. Chen, Insights into the Mo-Doping Effect on the Electrocatalytic Performance of Hierarchical Co<sub>x</sub>Mo<sub>y</sub>S Nanosheet Arrays for Hydrogen Generation and Urea Oxidation, *ACS Applied Materials & Interfaces*, 2020, **12**, 40194-40203.
7. X. Du, C. Huang and X. Zhang, Synthesis of CoMoO<sub>4</sub>/Co<sub>9</sub>S<sub>8</sub> network arrays on nickel foam as efficient urea oxidation and hydrogen evolution catalyst, *International Journal of Hydrogen Energy*, 2019, **44**, 19595-19602.
8. X. Du, C. Huang and X. Zhang, Co<sub>3</sub>O<sub>4</sub> arrays with tailored morphology as robust water oxidation and urea splitting catalyst, *Journal of Alloys and Compounds*, 2019, **809**, 151821.
9. Y. Xu, T. Ren, K. Ren, S. Yu, M. Liu, Z. Wang, X. Li, L. Wang and H. Wang, Metal-organic frameworks-derived Ru-doped Co<sub>2</sub>P/N-doped carbon composite nanosheet arrays as bifunctional electrocatalysts for hydrogen evolution and urea oxidation, *Chemical Engineering Journal*, 2021, **408**, 127308.
10. J.-J. Zhang, W.-W. Bao, M.-Y. Li, C.-M. Yang and N.-N. Zhang, Ultrafast formation of an FeOOH electrocatalyst on Ni for efficient alkaline water and urea oxidation, *Chemical Communications*, 2020, **56**, 14713-14716.
11. R. K. Singh and A. Schechter, Electroactivity of NiCr catalysts for urea oxidation in alkaline electrolyte, *ChemCatChem*, 2017, **9**, 3374-3379.
12. A. Schranck, R. Marks, E. Yates and K. Doudrick, Effect of urine compounds on the electrochemical oxidation of urea using a nickel cobaltite catalyst: an electroanalytical and

- spectroscopic investigation, *Environmental science & technology*, 2018, **52**, 8638-8648.
13. Z. K. Ghouri, K. Elsaid, S. Al-Meer and N. A. M. Barakat, Applicable anode based on Co<sub>3</sub>O<sub>4</sub>-SrCO<sub>3</sub> heterostructure nanorods-incorporated CNFs with low-onset potential for DUFCS, *Applied Nanoscience*, 2017, **7**, 625-631.
  14. W. Shi and J. Lian, Mesoporous Cu(OH)<sub>2</sub> nanowire arrays for urea electrooxidation in alkaline medium, *Materials Chemistry and Physics*, 2020, **242**, 122517.
  15. A. Ozden, Y. Liu, C.-T. Dinh, J. Li, P. Ou, F. P. García de Arquer, E. H. Sargent and D. Sinton, Gold Adparticles on Silver Combine Low Overpotential and High Selectivity in Electrochemical CO<sub>2</sub> Conversion, *ACS Applied Energy Materials*, 2021.
  16. Y. C. Li, G. Lee, T. Yuan, Y. Wang, D.-H. Nam, Z. Wang, F. P. García de Arquer, Y. Lum, C.-T. Dinh and O. Voznyy, CO<sub>2</sub> electroreduction from carbonate electrolyte, *ACS Energy Letters*, 2019, **4**, 1427-1431.
